# Supplementary material for: Evaluation study of effect of virtual care education on healthcare providers’ knowledge, confidence, and satisfaction
Source: PeerJ. 2025 Nov 20;13:e20414. doi: 10.7717/peerj.20414 (PMC12640642; doi:10.7717/peerj.20414)
Supplement: Supplemental Information 3 [file peerj-13-20414-s003.xlsx]

## Sheet: Results
MDcme.ca Admin - Effective Virtual Care: Elevating Primary Care through Virtual Practice - Pre-Test Report - 2024-10-16
Mem ID	Pre-Test Date	Q1	Q2	Q3	Q4	Q5	Q6	Q7	Q8	Q9	Q10	Q11	Q12
1	2024-03-22 07:34:00	1	1	1	1	1	2	1	1	1	1	1	1
2	2024-03-25 20:34:00	1	1	3	3	3	2	2	2	2	2	2	1
3	2024-03-28 07:42:00	1	1	3	3	3	2	2	2	2	2	2	-1
4	2024-04-04 16:39:00	1	1	3	3	3	3	2	0	1	1	1	1
5	2024-05-01 16:47:00	1	1	3	3	3	2	3	2	3	3	3	3
6	2024-05-04 19:53:00	1	1	3	3	3	2	2	1	3	2	2	1
7	2024-05-16 10:17:00	1	1	3	3	3	2	1	1	1	1	1	1
8	2024-05-28 16:18:00	1	1	3	1	3	3	1	2	1	2	2	1
9	2024-05-29 19:24:00	1	1	3	3	3	2	2	2	2	2	2	1
10	2024-06-02 09:53:00	1	1	3	3	3	2	1	2	2	2	2	1
11	2024-06-04 08:15:00	1	1	3	3	3	2	3	3	3	3	3	3
12	2024-06-17 21:04:00	1	1	3	3	3	2	2	1	2	1	1	0
13	2024-06-18 13:18:00	1	1	1	3	3	2	2	2	0	2	3	1
14	2024-06-24 06:57:00	1	1	3	3	3	3	2	2	2	2	2	2
15	2024-06-28 12:30:00	1	1	3	3	3	2	2	2	3	2	2	2
16	2024-06-30 00:10:00	1	1	3	3	3	2	2	2	2	2	2	2
17	2024-06-30 22:26:00	1	1	3	3	3	2	2	3	3	2	2	2
17	2024-06-30 22:27:00	1	1	3	3	3	2	2	3	3	2	2	2
17	2024-06-30 22:27:00	1	1	3	3	3	2	2	3	3	2	2	2
17	2024-06-30 22:27:00	1	1	3	3	3	2	2	3	3	2	2	2
18	2024-07-09 10:40:00	1	1	3	3	3	2	2	2	2	2	2	2
19	2024-07-16 18:46:00	1	1	3	3	3	2	2	2	2	2	1	2
20	2024-08-10 16:09:00	1	1	3	3	3	2	1	2	1	1	1	1
21	2024-08-12 17:24:00	1	1	3	3	3	2	1	2	1	2	2	2
22	2024-08-17 22:49:00	1	2	3	4	1	2	1	2	2	2	2	2
23	2024-08-31 12:34:00	4	1	1	4	1	4	1	2	1	2	1	1
24	2024-09-17 12:36:00	1	1	3	3	3	2	2	2	2	2	2	2
25	2024-09-20 13:59:00	1	1	1	1	3	3	2	1	1	1	2	1
26	2024-10-15 12:31:00	1	1	3	3	3	2	1	1	1	1	1	1
MDcme.ca Admin - Effective Virtual Care: Elevating Primary Care through Virtual Practice - Post-Test Report - 2024-10-16
Mem ID	Post-Test Date	Q1	Q2	Q3	Q4	Q5	Q6	Q7	Q8	Q9	Q10	Q11	Q12
27	2024-03-05 14:24:00	1	1	4	1	3	3	3	3	3	3	3	3
1	2024-03-22 07:37:00	1	1	3	3	1	2	1	2	1	1	1	1
2	2024-03-26 20:14:00	1	1	3	3	3	2	3	3	3	3	3	2
3	2024-03-28 15:38:00	1	1	3	3	3	2	3	3	3	3	3	3
5	2024-05-01 17:01:00	1	1	3	3	3	2	3	3	3	3	3	3
6	2024-05-04 20:25:00	1	1	3	3	3	2	3	3	3	3	3	3
7	2024-05-16 10:22:00	1	1	3	3	3	2	2	2	2	2	2	2
8	2024-05-29 16:13:00	5	1	3	3	3	2	-1	-1	-1	-1	-1	-1
9	2024-05-29 19:35:00	1	1	3	3	3	2	3	3	3	3	3	3
10	2024-06-02 10:22:00	1	1	3	3	3	2	2	2	2	2	2	2
11	2024-06-06 14:53:00	1	1	3	3	3	2	3	3	3	3	3	3
13	2024-06-18 18:43:00	1	1	3	3	3	2	3	3	3	3	3	3
12	2024-06-18 19:06:00	5	1	3	3	3	2	3	3	3	3	3	3
14	2024-06-24 07:12:00	1	1	3	3	3	2	2	2	2	2	2	2
28	2024-06-25 19:39:00	1	1	3	3	3	2	2	2	1	2	1	2
16	2024-06-30 00:17:00	1	1	3	3	3	2	3	3	3	3	3	3
15	2024-07-04 08:42:00	1	1	3	3	3	3	2	2	2	2	2	2
19	2024-07-16 21:05:00	1	1	3	3	3	2	3	3	3	3	3	3
20	2024-08-10 21:17:00	1	1	3	3	3	2	3	3	3	3	3	2
21	2024-08-12 20:15:00	1	1	3	3	3	2	2	2	2	2	2	2
22	2024-08-17 22:52:00	1	1	3	4	3	2	2	2	2	2	2	2
23	2024-08-31 12:40:00	1	1	3	3	3	2	2	2	2	2	3	2
24	2024-09-17 21:07:00	1	1	3	3	3	2	3	3	3	3	3	3
25	2024-09-23 08:40:00	1	1	3	3	1	2	-1	-1	-1	-1	-1	-1
29	2024-10-11 17:08:00	1	1	3	3	3	2	2	2	2	2	2	2
