# Supplementary material for: Evaluation study of effect of virtual care education on healthcare providers’ knowledge, confidence, and satisfaction
Source: PeerJ. 2025 Nov 20;13:e20414. doi: 10.7717/peerj.20414 (PMC12640642; doi:10.7717/peerj.20414)
Supplement: Supplemental Information 7 [file peerj-13-20414-s007.xlsx]

## Sheet: Sheet1
ID	QUESTION / RESPONSE
	What considerations should Dr. Smith examine in order to determine the readiness of their practice for virtual care?
1	patient readiness/technology requirements , privacy , office workflow/triage, appropriateness of the complaint for virtual care
2	Patient, staff and own familiarity with technology
	Patient willingness, consent
	Appropriate setting
	Appropriate platform
3	- workspace
	- equipment
	- set up
4	staff education
	necessary equipment
	private area
	password protected
	encrypted
	adequate bandwidth
	pt consent
	pt education
	professions standards of care
5	1. Have all the equipment necessary for setting up a Virtual Care. The equipment, the platform, the place with privacy maintained.
	2. Have proper registration process. Take consent for Virtual care. Describe the limitations of the system.
	3. Train the staff for help with the Virtual care and have experts to timely correct any glitches&#8217; with the systems in use.
5	patient consent must be taken as mentioned in my reply.
	The patient needs to be educated about how to manage the equipment for monitoring and communication.
6	EMR, secure internet access, secure area for delivering virtual care, high speed internet
7	choice of patient, their technological knowledge, availability of resources, and clinical scanarios
8	1) High-speed internet and consistency
	2) Patient access to the infrastructures for virtual communication
	3) Permission from Health care Regulatory bodies to deliver virtual care
	4)Educated supporting staff to manage, schedule and control the office timeline
9	Access to high power internet, technical staff for training, troubleshooting, security of the platforms
10	System capabilities
11	Availability of appropriate and secured environment, equipment, software, training, knowledge and skills of users.
	Secured stable and fast Internet
	Ability of the clients to participate in virtual care (equipment, knowledge to handle the technology)
12	whether he can obtain the necessary information to support clinic decision making and a theraputic relationship with a virtual visits
13	work flow, time, technology
14	Access and setup
	Applications
	Best practices, policies and standards
	the Patient and supporting providers
	schedules and space
15	- Prepare patients and staff. - Environmental consideration like net coverage, devices availability, - Medicolegal considerations that follow the local and provincial rules and guidelines, - Privacy and confidentiality considerations
16	Certainly
17	Good internet access for the clinic, private space, and their patient needs
18	FIRST HE HAS TO EVCALUATE HIS ABILITY TO ADAPT TO TAKE CARE OF PATIENT VERTUALLY AND IF HE FEELS CONFIDENT ABOUT USING TECHNOLOGY, THEN ASSESS HIS PATIENT ABILITY TO USE TECHNOLOGY AND MADE A LIST WITH THE NAME OF PATIENTS THAT MAY BE ABLE TO FOLLOW REMOTE CARE AND TECH THEM HOW TO DO IT AND ALWAYS BEFORE STARTING ANY MEETING HE HAS TO CHOSE AN APPROPRIATE LOCATION TO KEEP HIS PATIENT CONFIDENTIA…
	Assuming that Dr. Smith decides to pursue the adoption of virtual care delivery in their practice, what other things should they plan for in order to prepare?
2	Plan for in-person follow-up if deemed necessary
	Tech support
4	trial run
	consult with professional body
	documentation guidelines and standards
7	technological availability
	accessibility of resources
	patient willingness to participate in virtual consultation
8	1) Having a license to deliver this type of care to his patients.
	2) Checking patient consent and readiness
11	Same as previous answer,
	and checklist and templets
12	if the patient is comfortable and capable of effectively using virtual care technolgy, patient clincal situation.
15	- Providing the necessary equipment and device, - Proper training for the staff, - Preparing and educating the patients about the virtual medical care, Follow the local and provincial rules and guidelines, - Maintain the standard level of care
16	Certainly
17	Good clinic workflow and set times for VC appts, ensuring staff are trained on how to work any technology that is needed for VC. Good communication to staff and patients of this new process and provide as much education to staff as needed. Also provide patients with material as well so they understand how it works and how to use it. Also downtime if there are internet issues, there should be some…
18	PATIENT AWARNESS ABOUT VIRTUAL CARE LIMIT AND THE ISSUE WITH THE CONFIDENTIALITY.
	Dr. Smith recognizes the importance of managing the workflow in their clinic to effectively integrate virtual care services. How might Dr. Smith approach understanding and modifying existing workflows in their clinic?
4	hire appropriate number of staff to book appts, filing, ect
7	by proper scheduling of appointment
8	1) constant communication with office staff
	2) Ongoing Education about the platform and scheduling
	3) Leadership, communication, and collaboration with the chief manager in the office
19	Assess the current workflow. The number of appointments per day. The diversity of cases usually seen in the clinic
12	clinical situation, level of acuity, capabilities of clinicians and support stuff, capabilities of patients and caregivers, and guidance from regularity authorities
13	working with him team
15	-Continuous evaluation of the virtual care project, - Making proper plans and adjustments to improve the works` standards
16	Certainly
17	Ensure all staff have time to work with the new platform and provide feed back into what works and what doesn&#8217;t. They can then continue to build on any new/existing workflows to ensure there is a smooth transition at their site for all users and patients.
18	Dr Smith could devide patient based on their symptoms and share with his patient a list of symptoms that could be seen virtually and those who have to be seen on person. In addition, her could share his availabilty to see his patients remotly and the patient could choose the appropriate time for them to be seen.
	What strategies might Dr. Smith use to help prepare their patients?
2	Patient information package.
	Patient test of technology with staff
4	virtual care pamphlets, posters,social media to educate pts on process, FAQs,
7	providing proper instructions beforehand
	providing technological support
	ensuring private and safe environment
8	1) Education and constant discussion about the cost and benefits of virtual care
	2) Always check patients&#8217; electronic devices to be prepared.
	3)Giving brochures and pamphlets letting patients know better about virtual care
9	Training them on the platforms, asking to log on and test the platform to ensure it works for them, ensure compatibiliy wth their devices, report any problems, have alternate platform to use in case of failure
12	are they familiar and comfortable with virtual care, have access to private internet and secure devices, the environment around them are secure and confidential, pre- meeting education to use the virtual care.
15	- Education about the virtual care through direct talk, websites, brochures, literatures, making sure that patients are familiar with the modern technologies
16	Yes
17	Prepare them with documentation of what this is and how it can be used by providing them with material when they are in the clinic, send out emails with links to videos of how to use it and allow for a place for Q and A.
18	Explain to them how the remotely visit will be done and how they can assess their hjealth issues and practice some physical exam on themself. Also, give them some links to some useful ressources for more information.
	How would Dr. Smith determine if this patient is a good candidate for virtual care?
2	Has appropriate internet or phone access, appropriate technology familiarity, appropriate medical complaint
4	review guidelines to determine if pt&#8217;s complaint is appropriate for virtual care
	determine if pt has technology appropriate for a virtual care appt.
	assess pt&#8217;s knowledge regarding the process
6	Give secretary an idea ahead of time before booking
7	by going through their medical records
8	1) Getting information about the patient&#8217;s knowledge and understanding of social media, the internet, and different platforms
	2) Will the patient consent to go with virtual care or not
	3) Patients readiness for different modalities need to be discussed
9	By triaging on booking. Cases such as cough, ear pain, neurological problems are not great for virtual
12	according to health care situation
15	-Patient understands the goals, benefits, and limitations of the virtual care, - Have the proper equipment and is familiar with these devices,
16	Yts
17	If they call mostly for Rx refills, or have a rash or shoulder pain, things that you can do over the phone or video where you can see.
18	Based on his symptoms and his medical history and his knowledge of technology.
	What things should Dr. Smith consider in terms of setting up the physical clinical space for the virtual care visit?
1	privacy away from other patients preventing eavesdropping, neutral backdrop
2	Quiet, private, neutral space with appropriate background
4	private area
	no open windows or doors
	if video practitioner dress professional, be easily seen on video, be easily heard
6	Private room
7	privacy and technical support
8	1) Confirmation of high speed and strong internet connection.
	2) Making sure with patients that no one else will see or hear the virtual visit unless the circle of care
	3) Virtual care should be in a private and surrounding area.
	4) same ethical, professional responsibility will govern the virtual visit
9	Ensure privacy, clear background, high speed internet
9	Ensure privacy, clean and clear backdrop
12	assure privacy and that is conductive of an effective interaction between the physician and the patient
15	- Respect patient privacy and confidentiality, - Has good visual and sound qualities, - Provides a comfortable and standard condition for both patient and doctor
16	Certainly
17	Ensure it is private that windows and doors can be closed, that is bright and the wifi or internet has a good connection to ensure no dropped calls or video.
18	no distraction, safe and able to keep the confidentiality of the patient.
	also, technical requirement, internet with high speed.
	What things should Dr. Smith attend to during his virtual care session with Mr. Anderson?
1	verify identify of patient, appropriately introduce doctor with license/credentials if applicable , ensure treatment plan is understood
2	Ensure comfortable with virtual technology. Ensure communication is clear. Ensure concern would not be more appropriately dealt with by in-person visit
4	pt's comfort level with appt
	providing privacy and confidentiality
	be confident
	address pts problem using best practice guidelines
	ensure to address any of the pts questions
	arrange f/u if needed
	arrange Lab or diagnostic testing
	arrange in person if necessary
7	privacy
8	1) Access to the medical chart of the patients
	2) Laboratory, Imaging or consultation results need to be ready
9	Obtain consent for the visit, document if they are comfortable having a private discussion where they are, document if they have someone with them, clarify name and details like date of birth, clear tone, make alternate arrangement in case the visit fails
12	have at the same time access to the patient medical record chart to safe time and easily check recent result of his medical investigations
15	- Listening to patient`s complain, - Provide possible physical exam, - Has the patient`s medical record available with the necessary labs, - Proper recording of the patient`s meeting details
16	F
17	Ask for consent, ask the patient to provide fname/lname/DOB and maybe photo ID if needed and stat what this visit is for.
18	medical assessment, the gravity of the symptoms, educate the patient about red flags when to seek immediat medical visit and when to book in person medical visit
	After completing this module on virtual care, what are some of the key learning points that you are taking away from this experience?
4	Being prepared to provide virtual care to pts
	Having the necessary space, education and technology to delivery safe virtual care
	Undering the types of pt complaints that are appropriate and those that are not such ad Cardiac, MSK, Ears
	Developing trust and rapport, ensuring pts right to confidentiality and privacy.
	Ensuring pt understands the process and has the necessary technology,
6	Making sure to use identifiers to identify the pt before starting the care session
7	how to integrate virtual consultation in your practice
8	1) Selecting the right patient, and the right condition to deal with.
	2) The same ethical, professional responsibility .
	3) Informed consent of the patients
9	Ensure privacy and correct details before commencing, obtain consent, reiterate questions if they are comfortable sharing information via the net, if they are with people
	Ensure they are familiar with the device or App to be used, inform them about ED visit if they need urgent care, alternate means of communication if this fails, be professional as we would be on an in-person visit, document everything
19	Virtual care requires the same responsibilities from the doctor as in-person encounters.
	Making sure the patient is safe and able to use the technology.
	Virtual care is evolving quickly, and regulations and laws regarding its practice keep evolving and changing.
12	I become more familiar and very confident now about virtual care
13	nothing
15	_ Importance of the virtual care, and how it can improve the standard of care, - What are the requirements to start a virtual care system, - How to start a virtual system, - What are the challenges, and the limitations, - How to choose patients and what conditions can be seen through virtual care
16	Certainly
17	Ensure staff have training and time to use this before go live, ensure patients know what is coming and are provided material and videos of how to use this and time to test at home before talking to the provider.
18	we have to keep in mind that both in person and remotely visit we have to think about confidentiality and ethical issues. sometimes, there is some limitation for the remote visit and we need to inform the patient about all the details and get the informed consent. All the team have to be ready for the remote visit and get training for that.
