# Supplementary material for: Evaluation study of effect of virtual care education on healthcare providers’ knowledge, confidence, and satisfaction
Source: PeerJ. 2025 Nov 20;13:e20414. doi: 10.7717/peerj.20414 (PMC12640642; doi:10.7717/peerj.20414)
Supplement: Supplemental Information 8 [file peerj-13-20414-s008.xlsx]

## Sheet: Rubric
Criteria for Each Question					Question-Specific Rubric
Completeness (2 points)					1. What considerations should Dr. Smith examine to determine readiness for virtual care?
2 points: Addresses all major aspects of the question.					Completeness: Discusses patient readiness, technology, office workflow, and appropriateness of the complaint.
1 point: Partially addresses major aspects or includes some relevant points.					Specificity: Mentions examples like patient willingness, triage systems, bandwidth, encryption, etc.
0 points: Omits key aspects or provides irrelevant content.					Relevance: Stays focused on readiness factors, avoiding implementation steps.
Specificity (2 points)					2. What other things should Dr. Smith plan for to prepare for virtual care?
2 points: Provides detailed examples, steps, or considerations.					Completeness: Includes aspects like staff training, patient education, securing funding, and ensuring adherence to professional standards.
1 point: Offers general but relevant points without specifics.					Specificity: Offers details like role-specific staff training, patient consent forms, or accreditation requirements.
0 points: Provides vague or overly broad responses.
					3. How might Dr. Smith approach understanding and modifying workflows?
Relevance (1 point)
					Completeness: Includes mapping current workflows, identifying bottlenecks, and redesigning processes.
1 point: Information aligns directly with the question’s intent.					Specificity: Details tools like workflow diagrams or steps like engaging staff for input.
0 points: Information is off-topic or misinterprets the question.					Relevance: Stays on the topic of workflow redesign, not general readiness.
					4. What strategies might Dr. Smith use to help prepare their patients?
					Completeness: Covers education, communication, and addressing patient barriers.
					Specificity: Mentions patient-friendly guides, Q&A sessions, or tech training.
					5. How would Dr. Smith determine if a patient is a good candidate for virtual care?
					Completeness: Includes medical appropriateness, tech access, patient ability, and consent.
					Specificity: Provides criteria like stability of the condition, home internet reliability, and digital literacy.
					6. What should Dr. Smith consider in setting up the physical clinical space?
					Completeness: Mentions equipment, private workspace, lighting, and soundproofing.
					Specificity: Includes encryption for devices, proper camera angles, or ergonomic furniture.
					7. What should Dr. Smith attend to during a virtual care session?
					Completeness: Discusses patient privacy, technical quality, and professional communication.
					Specificity: Examples like using two-factor authentication or confirming patient identity.
					8. Key learning points after completing the module:
					Completeness: Summarizes takeaways related to readiness, workflow, patient prep, and best practices.
					Specificity: Includes specific learnings like how to map workflows or select secure platforms.

## Sheet: Consensus
Question 1: What considerations should Dr. Smith examine in order to determine the readiness of their practice for virtual care?
User ID	MC	JB	Consensus
1	5	4	4.5
2	4	3	3.5
3	2	2	2		Mean	3.52941
4	5	4	4.5
5	5	3	4		Frequencies
6	4	4	4		0-0.5	0
7	3	3	3		1-1.5	1
8	5	5	5		2-2.5	2
9	4	4	4		3-3.5	6
10	1	1	1		4-4.5	6
11	5	5	5		5	2
12	3	2	2.5
13	3	3	3
14	4	2	3
15	4	3	3.5
16	0	0
17	3	3	3
18	4	5	4.5
Question 2: Assuming that Dr. Smith decides to pursue the adoption of virtual care delivery in their practice, what other things should they plan for in order to prepare?
User ID	MC	JB	Consensus
2	2	1	1.5		Mean	2.44444
4	3	2	2.5
7	2	2	2		Frequencies
8	3	2	2.5		0-0.5	0
11	1	1	1		1-1.5	3
12	2	1	1.5		2-2.5	4
15	4	4	4		3-3.5	0
16	0	0			4-4.5	2
17	5	4	4.5		5	0
18	3	2	2.5
Question 3: Dr. Smith recognizes the importance of managing the workflow in their clinic to effectively integrate virtual care services. How might Dr. Smith approach understanding and modifying existing workflows in their clinic?
User ID	MC	JB	Consensus
4	3	2	2.5
7	2	2	2		Mean	2.94444
8	4	4	4
19	4	2	3		Frequencies
12	3	3	3		0-0.5	0
13	2	2	2		1-1.5	0
15	3	3	3		2-2.5	3
16	0	0			3-3.5	5
17	4	3	3.5		4-4.5	1
18	4	3	3.5		5	0
Question 4: What strategies might Dr. Smith use to help prepare their patients?
User ID	MC	JB	Consensus
2	4	4	4		Mean	4.55556
4	4	4	4
7	4	5	4.5		Frequencies
8	5	5	5		0-0.5	0
9	5	5	5		1-1.5	0
12	5	5	5		2-2.5	0
15	5	5	5		3-3.5	0
16	0	0			4-4.5	5
17	4	5	4.5		5	4
18	4	4	4
Question 5: How would Dr. Smith determine if this patient is a good candidate for virtual care?
User ID	MC	JB	Consensus
2	4	5	4.5		Mean	3.35
4	5	5	5
6	1	1	1		Frequencies
7	3	2	2.5		0-0.5	0
8	4	4	4		1-1.5	1
9	4	3	3.5		2-2.5	2
12	2	2	2		3-3.5	3
15	4	3	3.5		4-4.5	3
16	0	0			5	1
17	4	3	3.5
18	4	4	4
Question 6: What things should Dr. Smith consider in terms of setting up the physical clinical space for the virtual care visit?
User ID	MC	Total	Consensus
1	4	3	3.5		Mean	3.40909
2	4	3	3.5
4	3	4	3.5		Frequencies
6	3	2	2.5		0-0.5	0
7	3	3	3		1-1.5	0
8	4	3	3.5		2-2.5	1
9	4	3	3.5		3-3.5	8
12	3	3	3		4-4.5	2
15	4	3	3.5		5	0
16	0	0
17	5	3	4
18	5	3	4
Question 7: What things should Dr. Smith attend to during his virtual care session with Mr. Anderson?
User ID	MC	JB	Consensus
1	5	3	4
2	4	3	3.5		Mean	3.15
4	4	4	4
7	2	2	2		Frequencies
8	3	2	2.5		0-0.5	0
9	5	4	4.5		1-1.5	0
12	3	2	2.5		2-2.5	5
15	3	2	2.5		3-3.5	1
16	0	0			4-4.5	4
17	4	4	4		5	0
18	2	2	2
Question 8: After completing this module on virtual care, what are some of the key learning points that you are taking away from this experience?
User ID	MC	JB	Consensus
4	5	5	5
6	3	3	3		Mean	4.2
7	2	2	2
8	5	5	5		Frequencies
9	5	5	5		0-0.5	0
19	5	5	5		1-1.5	0
12	3	1	2		2-2.5	2
13	0	0			3-3.5	1
15	5	5	5		4-4.5	0
16	0	0			5	7
17	5	5	5
18	5	5	5
