# Supplementary material for: Evaluation study of effect of virtual care education on healthcare providers’ knowledge, confidence, and satisfaction
Source: PeerJ. 2025 Nov 20;13:e20414. doi: 10.7717/peerj.20414 (PMC12640642; doi:10.7717/peerj.20414)
Supplement: Supplemental Information 10 [file peerj-13-20414-s010.xlsx]

## Sheet: 3B. PrePost Confidence & Demogr
ID	StartDate	EndDate	Progress	Duration__in_seconds_	Finished	Q2_1	Q2_2	Q2_3	Q2_4	Q2_5	Q2_6	Q2_7	Q4_1	Q4_2	Q4_3	Q4_4	Q4_5	Q4_6	Q4_7	Q5	Q6	Q26_1	Q26_2	Q26_3	Q26_4	Q27_1	Q27_2	Q27_3	Q27_4	Q9	Q10	Q28	Q29	Q16	Q16_9_TEXT	Q17_1	Q17_2	Q17_3	Q17_4	Q17_4_TEXT	Q18	Q20	Q21	Q21_4_TEXT	Q19	Q19_7_TEXT	Q23	Q30	Q24_1
1	2024-03-22 05:38:00	2024-03-22 05:40:00	100	112	1	3	3	3	3	3	3	3					1			2		3	3	3	3	3	3	3	3					9					1		3	2	1		7
2	2024-03-22 05:40:00	2024-03-22 05:41:00	100	30	1
3	2024-05-01 15:02:00	2024-05-01 15:03:00	100	63	1	4	4	4	4	4	4	4		1		1	1			2		4	4	4	6	4	4	4	6					1			1	1			4	2	1		6
4	2024-05-04 18:26:00	2024-05-04 18:28:00	100	100	1	3	2	4	4	4	4	4		1					1	2		4	4	4	4	4	4	4	3					1			1				1	4	2		6
5	2024-05-16 08:22:00	2024-05-16 08:23:00	100	37	1	5	5	5	5	5	5	5								2		5	5	5	5	3	3	3	3					5				1			1	2	2		1
6	2024-06-18 17:08:00	2024-06-18 17:28:00	100	1237	1	5	5	4	5	6	6	5	1	1	1	1	1		1	2		5	4	4	6	5	6	4	3	New information and how to manage our old habits	Please, add some eduvational video clips	Adding a summary	-	1		1					5	1	1		1		Information regarding the baseline infrastructures and the ethical, proffessional laws around virtual care will make me more competent in my practice	More physicain and health care providers
7	2024-06-24 05:12:00	2024-06-24 05:13:00	10	39	0	3	3	3	3	3	3	3
8	2024-06-29 22:18:00	2024-06-29 22:20:00	100	91	1	5	5	5	5	5	5	5	1							2		5	5	5	5	5	5	5	5					1		1					4	2	2		1
9	2024-07-03 09:33:00	2024-07-04 06:15:00	10	74550	0
10	2024-07-03 10:18:00	2024-07-03 10:22:00	100	213	1
11	2024-07-04 08:11:00	2024-07-04 09:36:00	100	5121	1	4	4	4	4	4	4	4	1	1	1	1	1	1	1	2		4	4	4	6	4	4	4	4	Detailed information and well organized!	Present case scenarios on how to access specialist easier to test systems and perform different case scenarios to prepare for virtual care.	How to recruit champions more effectively from each department to test systems and peripherals, allowing us to move clinics forward easier, faster, and in a better way!	Continued education during the orientation of staff, promoting virtual care in all trainings, specifically on the use of the equipment. Utilize educators more effectively to include the same and coordinate with the virtual care coordinator.	9	Virtual Care				1	Virtual Care	2	1	1		1		N/A	N/A	1
12	2024-08-10 19:17:00	2024-08-10 19:19:00	100	99	1	5	5	5	4	5	5	5		1	1		1		1	2		5	5	5	6	6	6	6	6				Handling conflict	1			1				3	3	1		2				1
13	2024-08-31 10:40:00	2024-08-31 10:42:00	100	157	1	5	5	5	5	5	5	5	1							1	Thank you	5	5	5	5	5	5	5	5	Perfect	Thank you	Thank you	Leadership	2			1	1			5	2	1		1		5	5
[truncated: 6 more columns]
